# Supplementary material for: Integrated Taxonomy Revealed Genetic Differences in Morphologically Similar and Non-Sympatric Scoliodon macrorhynchos and S. laticaudus
Source: MDPI journal article supplement (doi:10.3390/ani12060681), 2022-03-08
Supplement: s1 [file s1]

## Article

# Integrated Taxonomy Revealed Genetic Differences in Morphologically Similar and Non-Sympatric *Scoliodon macrorhynchos* and *S. laticaudus*

Kean Chong Lim <sup>1</sup>, William T. White <sup>2</sup>, Amy Y. H. Then <sup>3,\*</sup>, Gavin J. P. Naylor <sup>4</sup>, Sirachai Arunrugstichai <sup>5</sup> and Kar-Hoe Loh <sup>1,\*</sup>

<sup>1</sup> Institute of Ocean and Earth Sciences, Universiti Malaya, Kuala Lumpur 50603, Malaysia; keanchonglim@gmail.com

<sup>2</sup> CSIRO National Research Collections Australia, Australia National Fish Collection, Hobart, TAS 7001, Australia; william.white@csiro.au

<sup>3</sup> Institute of Biological Sciences, Universiti Malaya, Kuala Lumpur 50603, Malaysia

<sup>4</sup> Florida Museum of Natural History, Dickinson Hall, Gainesville, FL 32601, USA; gjpnaylor@gmail.com

<sup>5</sup> Aow Thai Marine Ecology Centre, Bangkok 10100, Thailand; carcharodon.shinalodon@gmail.com

\* Correspondence: amy\_then@um.edu.my (A.Y.H.T.); khloh@um.edu.my (K.-H.L.)

**Citation:** Lim, K.C.; White, W.T.;

Then, A.Y.H.; Naylor, G.J.P.;

Arunrugstichai, S.; Loh, K.-H.

Integrated Taxonomy Revealed

Genetic Differences in

Morphologically Similar and

Non-Sympatric *Scoliodon*

*macrorhynchos* and *S. laticaudus*.

*Animals* **2022**, *12*, 681.

<https://doi.org/10.3390/ani12060681>

Academic Editor: Martina Francesca Marongiu

Received: 27 January 2022

Accepted: 5 March 2022

Published: 8 March 2022

**Publisher's Note:** MDPI stays neutral with regard to jurisdictional claims in published maps and institutional affiliations.

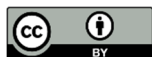

**Copyright:** © 2022 by the authors. Licensee MDPI, Basel, Switzerland. This article is an open access article distributed under the terms and conditions of the Creative Commons Attribution (CC BY) license (<https://creativecommons.org/licenses/by/4.0/>).

**Table S1** Genetic samples used in this study with locality data and GenBank accession numbers for each of the mitochondrial and nuclear markers.

| No. | Species                  | Sample | Location                  | Accession No. |          |          |          |          |          |          |          |          |
|-----|--------------------------|--------|---------------------------|---------------|----------|----------|----------|----------|----------|----------|----------|----------|
|     |                          |        |                           | COI           | NADH2    | ACT      | KBTBD2   | PROX1    | RAG1     | RAG2     | SCFD2    | TOB1     |
| 1.  | <i>S. cf. laticaudus</i> | 2-188  | Hutan Melintang, Malaysia | MW313850      | MW313870 |          |          |          |          |          |          |          |
| 2.  | <i>S. cf. laticaudus</i> | 2-256  | Pasir Penambang, Malaysia | MW313851      | MW313871 |          |          |          |          |          |          |          |
| 3.  | <i>S. cf. laticaudus</i> | 2-258  | Pasir Penambang, Malaysia | MW313852      | MW313872 |          |          |          |          |          |          |          |
| 4.  | <i>S. cf. laticaudus</i> | 2-854  | Hutan Melintang, Malaysia | MW313853      | MW313873 |          |          |          |          |          |          |          |
| 5.  | <i>S. cf. laticaudus</i> | 3-697  | Hutan Melintang, Malaysia | MW313859      |          |          |          |          |          |          |          |          |
| 6.  | <i>S. cf. laticaudus</i> | 4-013  | Pasir Penambang, Malaysia | MW313860      | MW313876 | MW313886 | MW313936 | MW313916 | MW313896 | MW313906 | MW313946 | MW313926 |
| 7.  | <i>S. cf. laticaudus</i> | 4-016  | Pasir Penambang, Malaysia | MW313861      | MW313877 | MW313887 | MW313937 | MW313917 | MW313897 | MW313907 | MW313947 | MW313927 |
| 8.  | <i>S. cf. laticaudus</i> | 4-072  | Sungai Besar, Malaysia    | MW313862      | MW313878 | MW313888 | MW313938 | MW313918 | MW313898 | MW313908 | MW313948 | MW313928 |
| 9.  | <i>S. cf. laticaudus</i> | 4-075  | Sungai Besar, Malaysia    | MW313863      | MW313879 | MW313889 | MW313939 | MW313919 | MW313899 | MW313909 | MW313949 | MW313929 |
| 10. | <i>S. cf. laticaudus</i> | 4-076  | Sungai Besar, Malaysia    | MW313864      | MW313880 | MW313890 | MW313940 | MW313920 | MW313900 | MW313910 | MW313950 | MW313930 |
| 11. | <i>S. macrorhynchos</i>  | 2-936  | Kuching, Malaysia         | MW313854      |          |          |          |          |          |          |          |          |
| 12. | <i>S. macrorhynchos</i>  | 2-950  | Kuching, Malaysia         | MW313855      | MW313874 |          |          |          |          |          |          |          |
| 13. | <i>S. macrorhynchos</i>  | 2-954  | Kuching, Malaysia         | MW313856      |          |          |          |          |          |          |          |          |
| 14. | <i>S. macrorhynchos</i>  | 3-032  | Kuching, Malaysia         | MW313857      |          |          |          |          |          |          |          |          |
| 15. | <i>S. macrorhynchos</i>  | 3-043  | Kuching, Malaysia         | MW313858      | MW313875 |          |          |          |          |          |          |          |
| 16. | <i>S. macrorhynchos</i>  | 4-081  | Mukah, Malaysia           | MW313865      | MW313881 | MW313891 | MW313941 | MW313921 | MW313901 | MW313911 | MW313951 | MW313931 |
| 17. | <i>S. macrorhynchos</i>  | 4-082  | Mukah, Malaysia           | MW313866      | MW313882 | MW313892 | MW313942 | MW313922 | MW313902 | MW313912 | MW313952 | MW313932 |
| 18. | <i>S. macrorhynchos</i>  | 4-088  | Mukah, Malaysia           | MW313867      | MW313883 | MW313893 | MW313943 | MW313923 | MW313903 | MW313913 | MW313953 | MW313933 |
| 19. | <i>S. macrorhynchos</i>  | 4-089  | Mukah, Malaysia           | MW313868      | MW313884 | MW313894 | MW313944 | MW313924 | MW313904 | MW313914 | MW313954 | MW313934 |
| 20. | <i>S. macrorhynchos</i>  | 4-492  | Mukah, Malaysia           | MW313869      | MW313885 | MW313895 | MW313945 | MW313925 | MW313905 | MW313915 | MW313955 | MW313935 |

**Table S2** Best model selected for maximum likelihood and Bayesian inference analysis according to each marker and the combined markers.

| <b>Markers</b>       | <b>Maximum Likelihood</b> | <b>Bayesian Inference</b> |
|----------------------|---------------------------|---------------------------|
| COI                  | J2 + Gamma                | HKY85 + Gamma             |
| NADH2                | J2 + Gamma                | J2 + Gamma                |
| <b>Mitochondrial</b> | <b>J2 + Gamma</b>         | <b>J2 + Gamma</b>         |
| ACT                  | HKY85 + Gamma             | HKY85 + Gamma             |
| RAG1                 | HKY85 + Gamma             | HKY85                     |
| RAG2                 | HKY85 + Gamma             | K80                       |
| PROX1                | TIM                       | TIM                       |
| TOB1                 | TN93ef                    | TN93ef                    |
| KBTBD2               | J1 + Gamma                | HKY85 + Gamma             |
| SCFD2                | K80                       | K80                       |
| <b>Nuclear</b>       | <b>TIM + Gamma</b>        | <b>HKY85 + Gamma</b>      |

**Table S3** NCBI GenBank and Barcode of Life Data (BOLD) Systems accession number of the reference sequences used in the analyses.

| Species                         | COI                                                                                                               | NADH2                                                                |
|---------------------------------|-------------------------------------------------------------------------------------------------------------------|----------------------------------------------------------------------|
| <i>Lamiopsis tephrodes</i>      | NC-028340                                                                                                         | NC-028340                                                            |
| <i>Loxodon macrorhinus</i>      | NC-029843                                                                                                         | NC-029843                                                            |
| <i>Scoliodon laticaudus</i> cf. | FAOL400-10, FAOL401-10, FAOL403-10, MH087056, MH230956, MH235708, MH429292, MN458374                              | JQ518655                                                             |
| <i>Scoliodon laticaudus</i>     | ANGBF11072-15, ANGBF11077-15, INELA009-12, INELA011-12, KERRI374-08, KP336547, PHANT755-08, PHANT758-08           | JQ518654, KP336547                                                   |
| <i>Scoliodon macrorhynchus</i>  | IRREK817-08, JQ693102, KERRI701-08, KERRI711-08, KERRI733-08, KERRI751-08, MN602076, MG220558, MG220559, MG220560 | JQ519090, JQ693102, KF927962, KF928963, KF927964, KF927965, MN602076 |
| <i>Sphyrna lewini</i>           | JX827259                                                                                                          | JX827259                                                             |

**Supplementary Data S1** Collection data for all specimens of *Scoliodon* examined in this study.*Scoliodon laticaudus*

India: MNHN 1066 (3 specimens), juvenile males 169, 187 and 258 mm TL, MNHN 1122, adult male 425 mm TL, Malabar coast, India, ~11° N, ~76° E; MNHN 1123, female 524 mm TL, Maharashtra, Mumbai, India, 18°56' N, 72°51' E; MNHN 1125, female 342 mm TL, Indian Ocean, exact locality not recorded; RMNH 8574, subadult male 353 mm TL, Malabar coast, India.

*Scoliodon cf. laticaudus*

Andaman Sea: CSIRO H 8400-01, female 478 mm TL, CSIRO H 8400-02, adult male 404 mm TL, Ranong fishing port, Thailand, 20 Jul. 2014; CSIRO H 8401-01, adult male 369 mm TL, CSIRO H 8401-02, female 278 mm TL, CSIRO H 8401-03, adult male 362 mm TL, CSIRO H 8401-04, female 263 mm TL, CSIRO H 8401-05, juvenile male 262 mm TL, CSIRO H 8401-06, female 302 mm TL, CSIRO H 8401-07, female 320 mm TL, CSIRO H 8401-08, female 294 mm TL, CSIRO H 8401-09, adult male 394 mm TL, CSIRO H 8401-10, female 265 mm TL, Ranong fishing port, Thailand, 25 Apr. 2015.

Bay of Bengal: MNHN 1041 (holotype of *S. muelleri*), adult male 490 mm TL, Bengal (now West Bengal in India and Bangladesh).

Peninsular Malaysia: unreg (field code 280416SB11), female 361 mm TL, unreg (field code 280416SB13), male 315 mm TL, unreg (field code 280416SB15), female 318 mm TL, unreg (field code 280416SB16), male 346 mm TL, Sungai Besar landing site, Malacca Strait, Malaysia, 28 Apr. 2016; unreg (field code 230316PPe16), male 273 mm TL, unreg (field code 230316PPe18), male 305 mm TL, unreg (field code 230316PPe19), female 292 mm TL, unreg (field code 230316PPe21), female 281 mm TL, unreg (field code 230316PPe22), male 331 mm TL, unreg (field code 230316PPe27), female 292 mm TL, Pasir Penambang landing site, Malacca Strait, Malaysia, 23 Mar. 2016; not retained specimens: 4 females (239–340 mm TL) and 7 males (253–316 mm TL), Malacca Strait, Malaysia.

*Scoliodon macrorhynchus*:

Hong Kong: CSIRO H 7074–01, female 325 mm TL, CSIRO H 7074–02, subadult male 337 mm TL, CSIRO H 7074–03, female 353 mm TL, CSIRO H 7074–04, female 346 mm TL, CSIRO H 7076–01, adult male 562 mm TL, CSIRO H 7076–02, pregnant female 511 mm TL

(jaws and chondrocranium only), CSIRO H 7076–03, (2 embryos from CSIRO H 7076–02) females 147 and 148 mm TL, CSIRO H 7076–04, adult male 555 mm TL (jaws and chondrocranium only), CSIRO H 7076–05, female 548 mm TL, Tuen Mun fish market, caught from Pearl River Estuary, Hong Kong,  $\sim 22^{\circ}20'$  N,  $113^{\circ}50'$  E, 04 Sept. 2009.

Indonesia: BMNH 1867.11.28.190, female 466 mm TL, probably collected with the lost holotype (Jakarta, Indonesia); CSIRO H 5861–01, adult male 436 mm TL, CSIRO H 5861–05, female  $\sim 440$  mm TL (tail tip damaged), CSIRO H 5861–06, female 239 mm TL, Muara Baru fish landing site, Jakarta, Indonesia (from southern Kalimantan), 18 Mar. 2002; RMNH 7369 (2), female 426 mm TL, female 236 mm TL, Jakarta (as Batavia), Indonesia, 1851?.

Malaysia: CSIRO H 4425–01, subadult male 317 mm TL, CSIRO H 4425–02, female 359 mm TL, Kuching, Sarawak, Malaysia, 16 Oct. 1995; CSIRO H 6227–01, adult male 387 mm TL, Sarawak, Malaysia, Jun. 2002; IPPS HBO22, adult male 390 mm TL, Mukah, Sarawak, Malaysia,  $02^{\circ}53.52'$  N,  $112^{\circ}05.44'$  E, 2002; IPPS WWPLAL#1, adult male 426 mm TL, IPPS WWPLAL#2, female 456 mm TL, IPPS WWPLAL#3, female 396 mm TL, IPPS WWPLAL#4, female 344 mm TL, Kuching fish market, Sarawak, Malaysia, 06 Nov. 2009; unreg (field code 050416MK37), male 264 mm TL, unreg (field code 050416MK38), female 262 mm TL, unreg (field code 050416MK39), male 252 mm TL, unreg (field code 050416MK40), male 299 mm TL, Mukah, Sarawak, Malaysian Borneo, 5 Apr. 2016; unreg (field code 060416MK11), female 303 mm TL, unreg (field code 060416MK12), male 364 mm TL, unreg (field code 060416MK16), female 309 mm TL, unreg (field code 060416MK25), male 286 mm TL, unreg (field code 060416MK26), male 291 mm TL, Mukah, Sarawak, Malaysian Borneo, 6 Apr. 2016; not retained specimens: 3 females (287–309 mm TL) and 3 males (227–290 mm TL), Malacca Strait, Malaysia.

Taiwan: CSIRO H 6295–21, adult male 458 mm TL, Tashi fish landing site, northeastern Taiwan, 24 May 2005.

Figure S1 Supplementary figures.

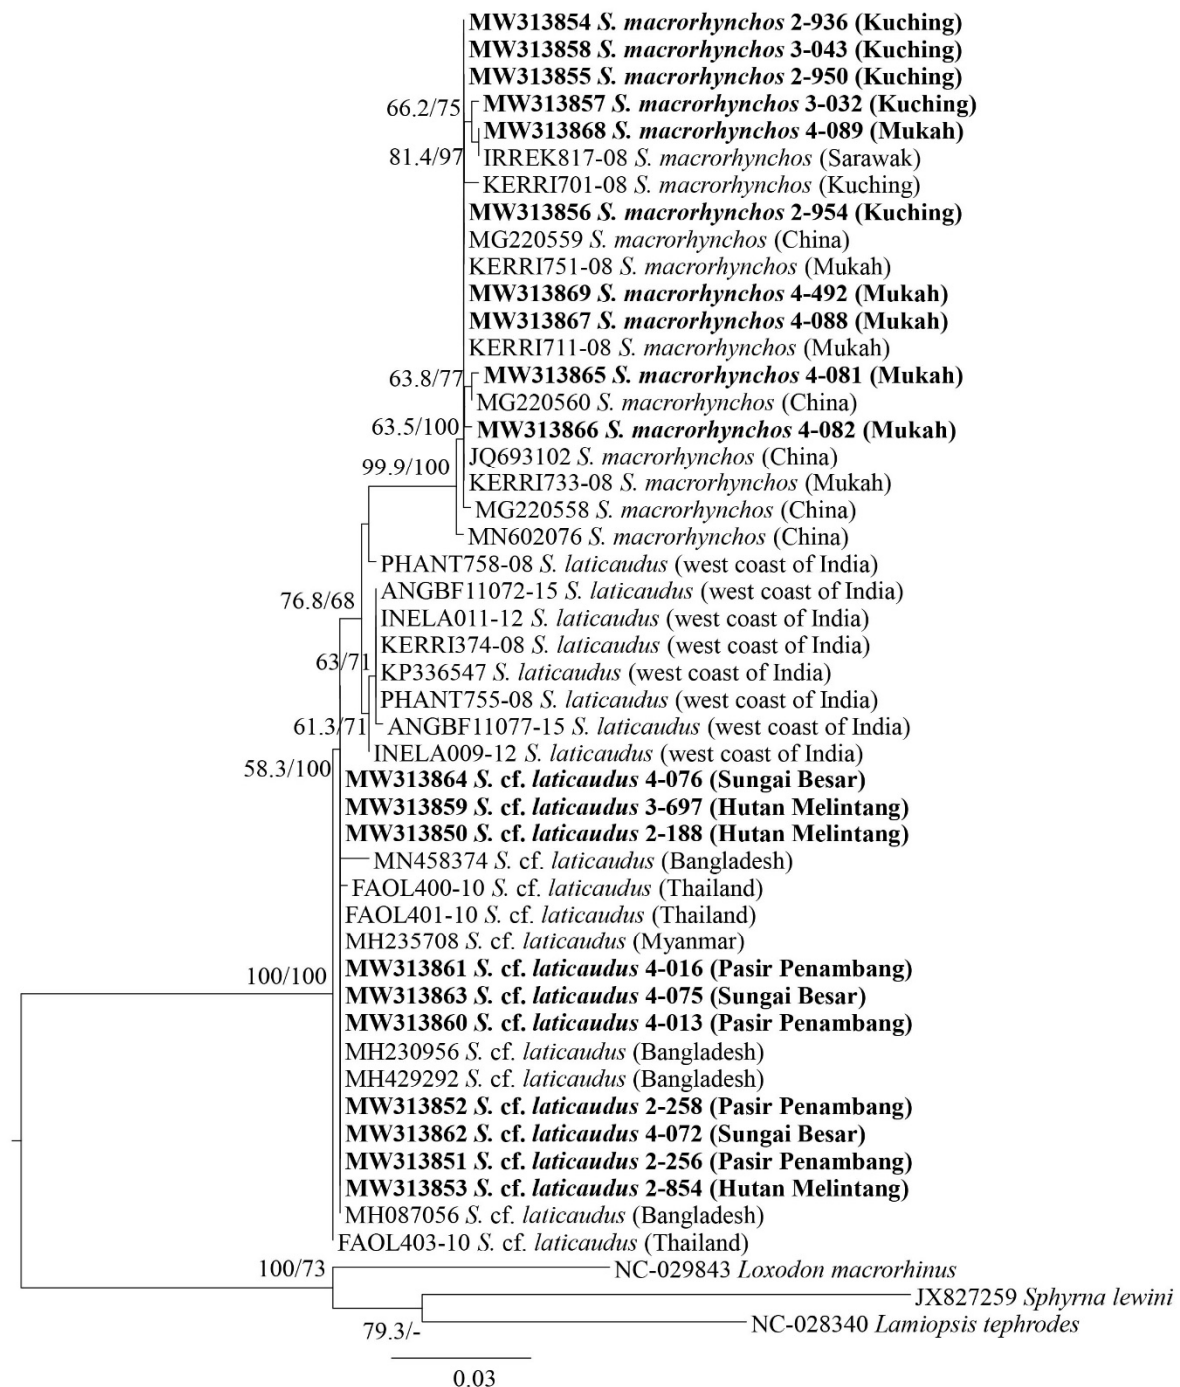

**Figure S1a.** COI gene mid-point rooting phylogenetic relationships of *Scoliodon* species (phylogram). The bootstrap values (ML/BI) are shown at branches. Sequence names in bold were from present study.

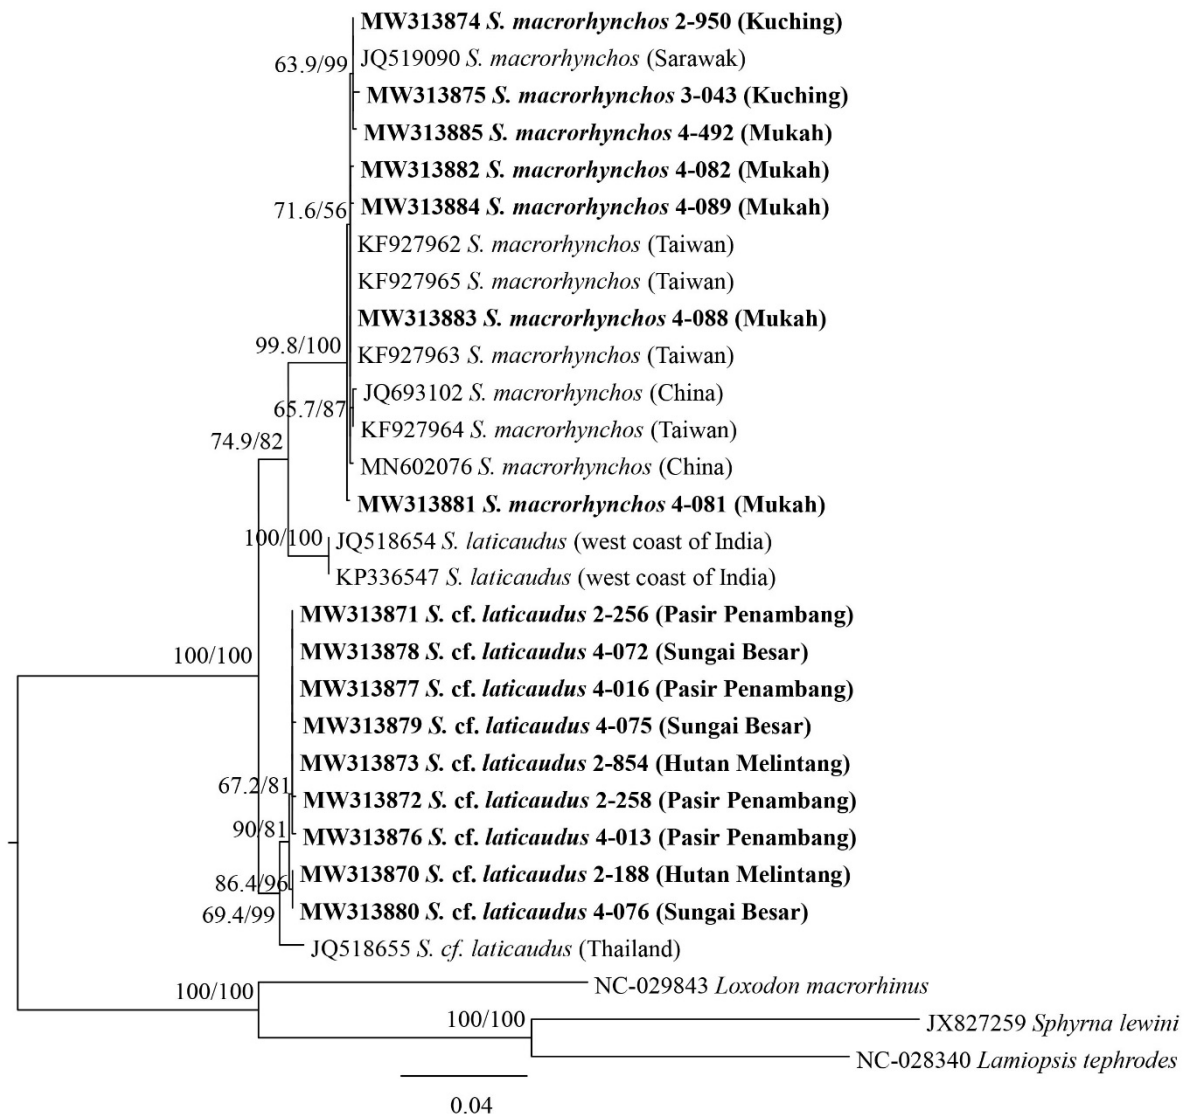

**Figure S1b.** NADH2 gene mid-point rooting phylogenetic relationships of *Scoliodon* species (phylogram). The bootstrap values (ML/BI) are shown at branches. Sequence names in bold were from present study.



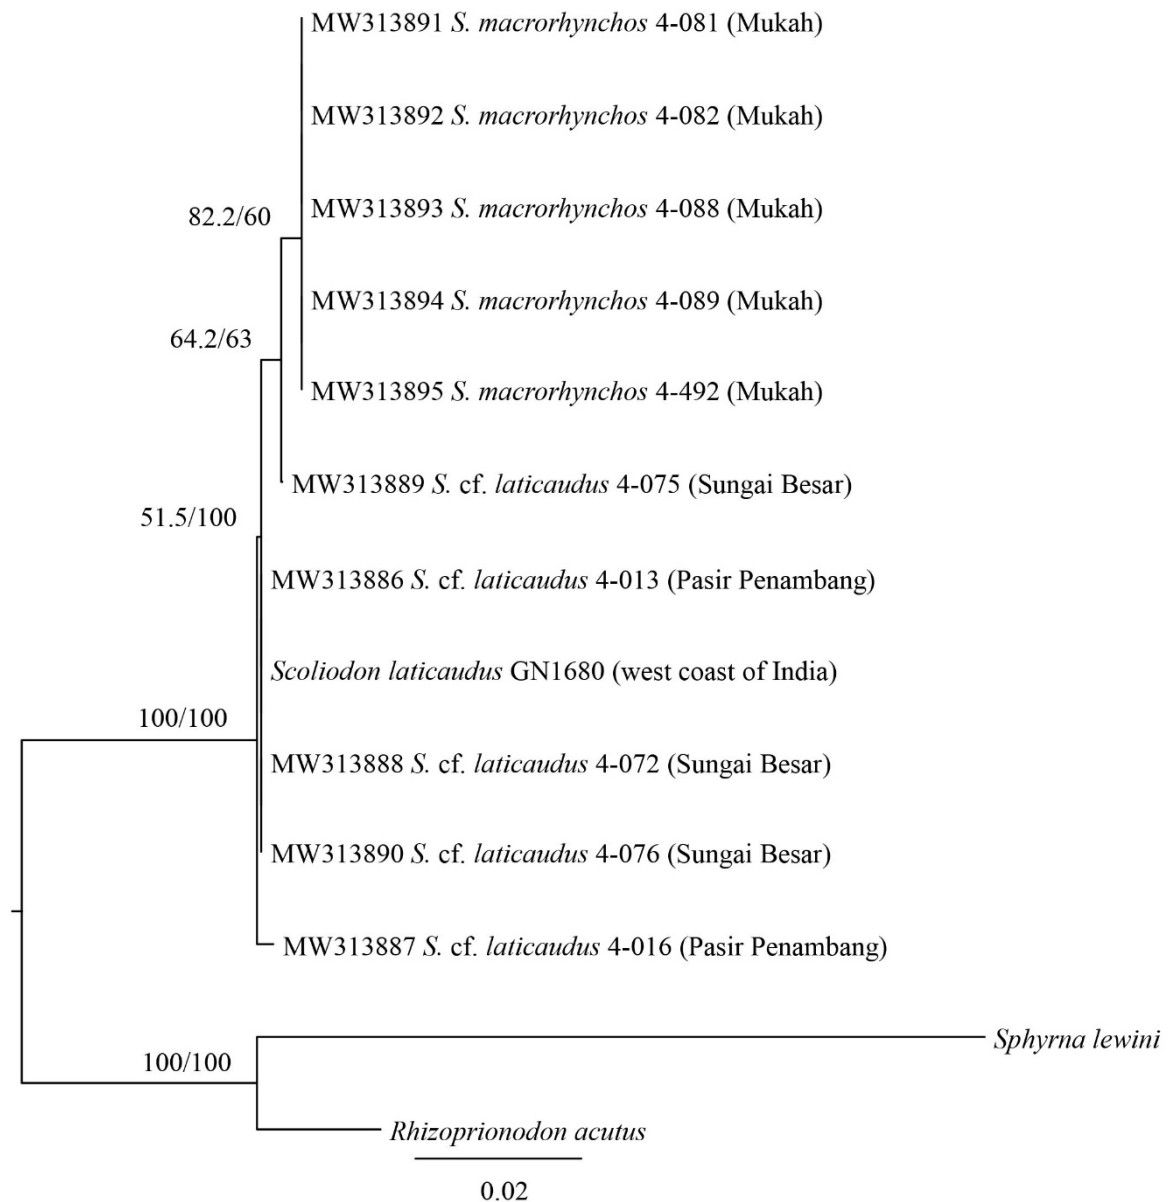

**Figure S1c.** ACT mid-point rooting phylogenetic relationships of *Scoliodon* species (phylogram). The bootstrap values (ML/BI) are shown at branches.

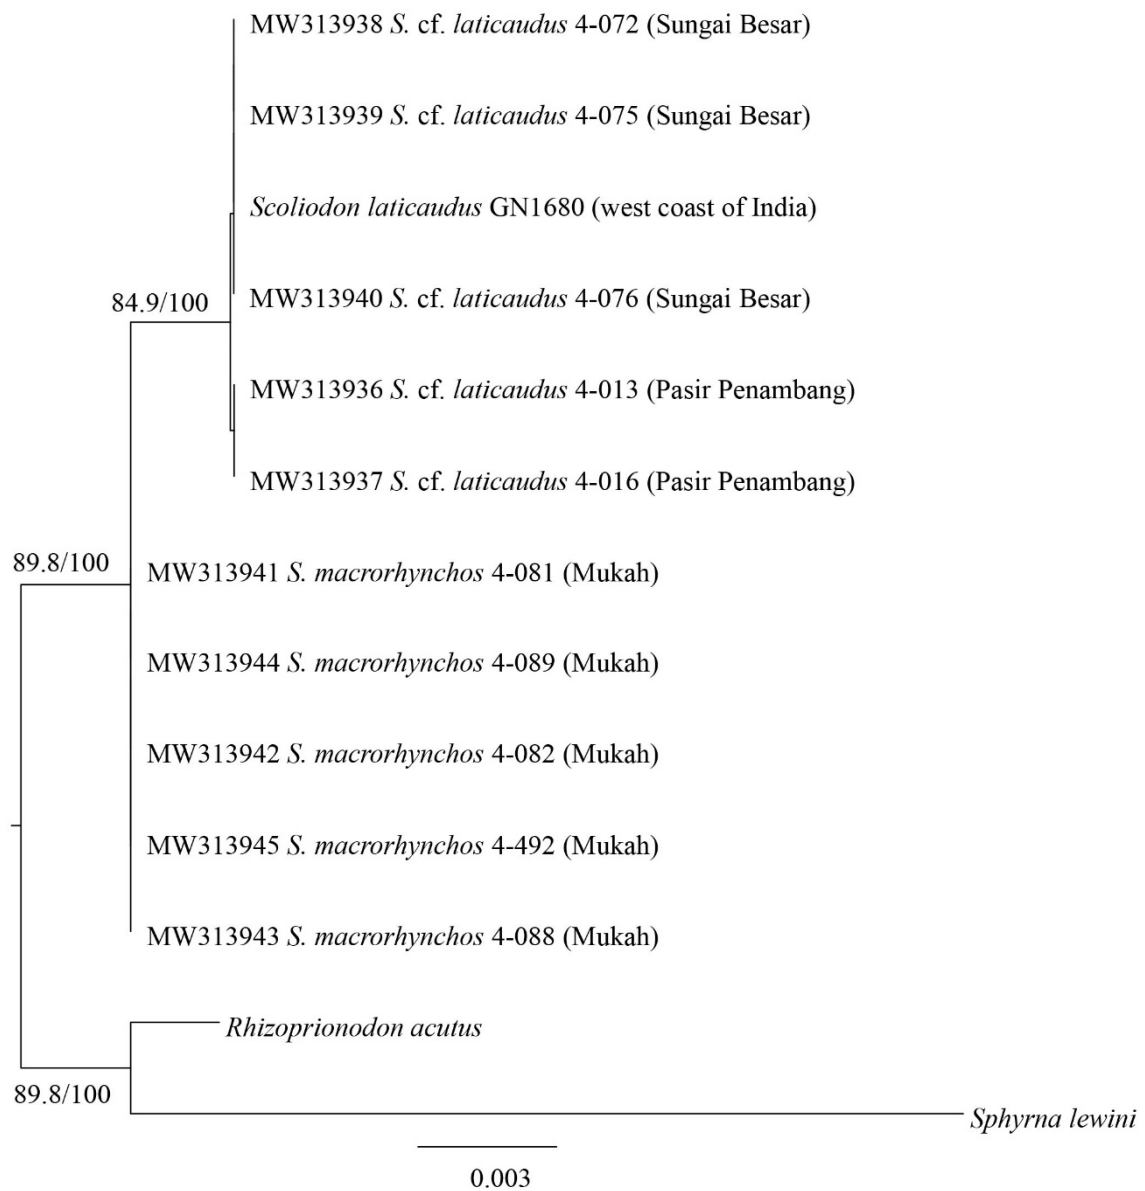

**Figure S1d.** KBTBD2 mid-point rooting phylogenetic relationships of *Scoliodon* species (phylogram). The bootstrap values (ML/BI) are shown at branches.

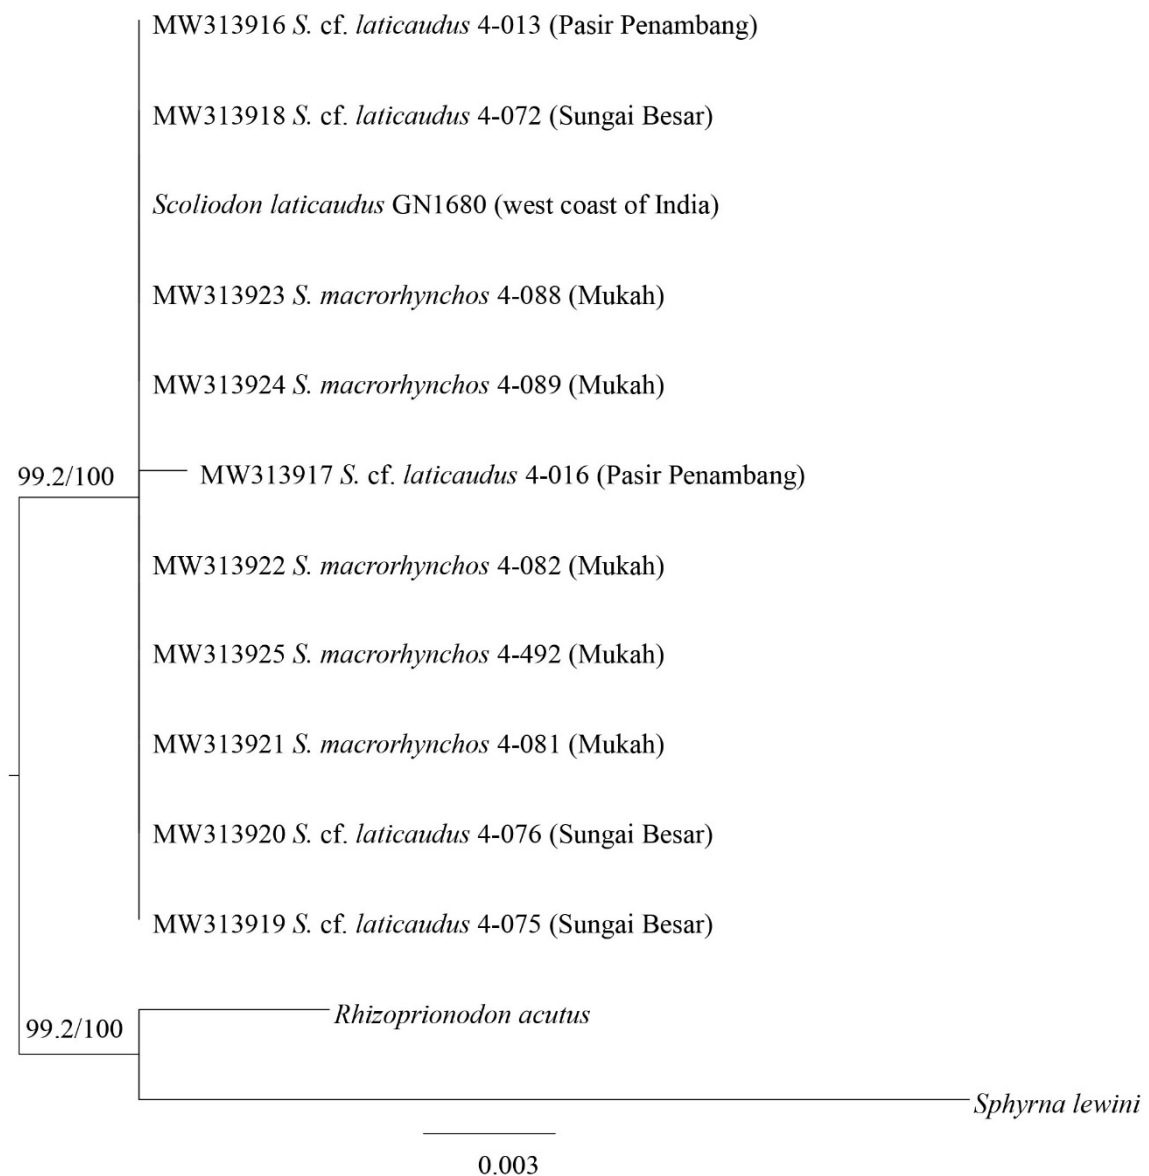

**Figure S1e.** PROX1 mid-point rooting phylogenetic relationships of *Scoliodon* species (phylogram). The bootstrap values (ML/Bi) are shown at branches.

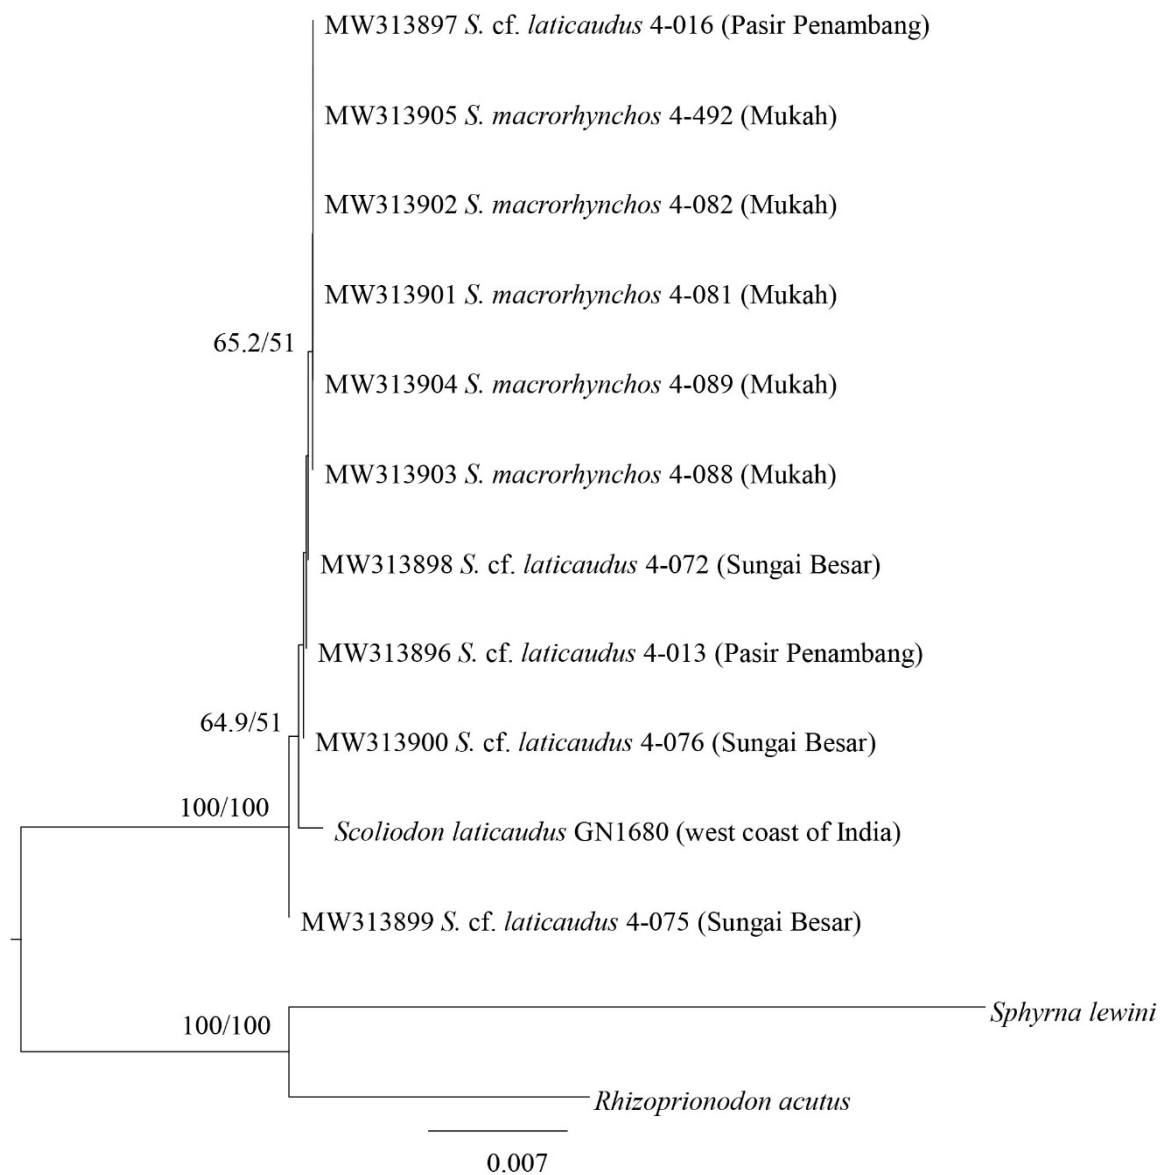

**Figure S1f.** RAG1 mid-point rooting phylogenetic relationships of *Scoliodon* species (phylogram). The bootstrap values (ML/Bi) are shown at branches.

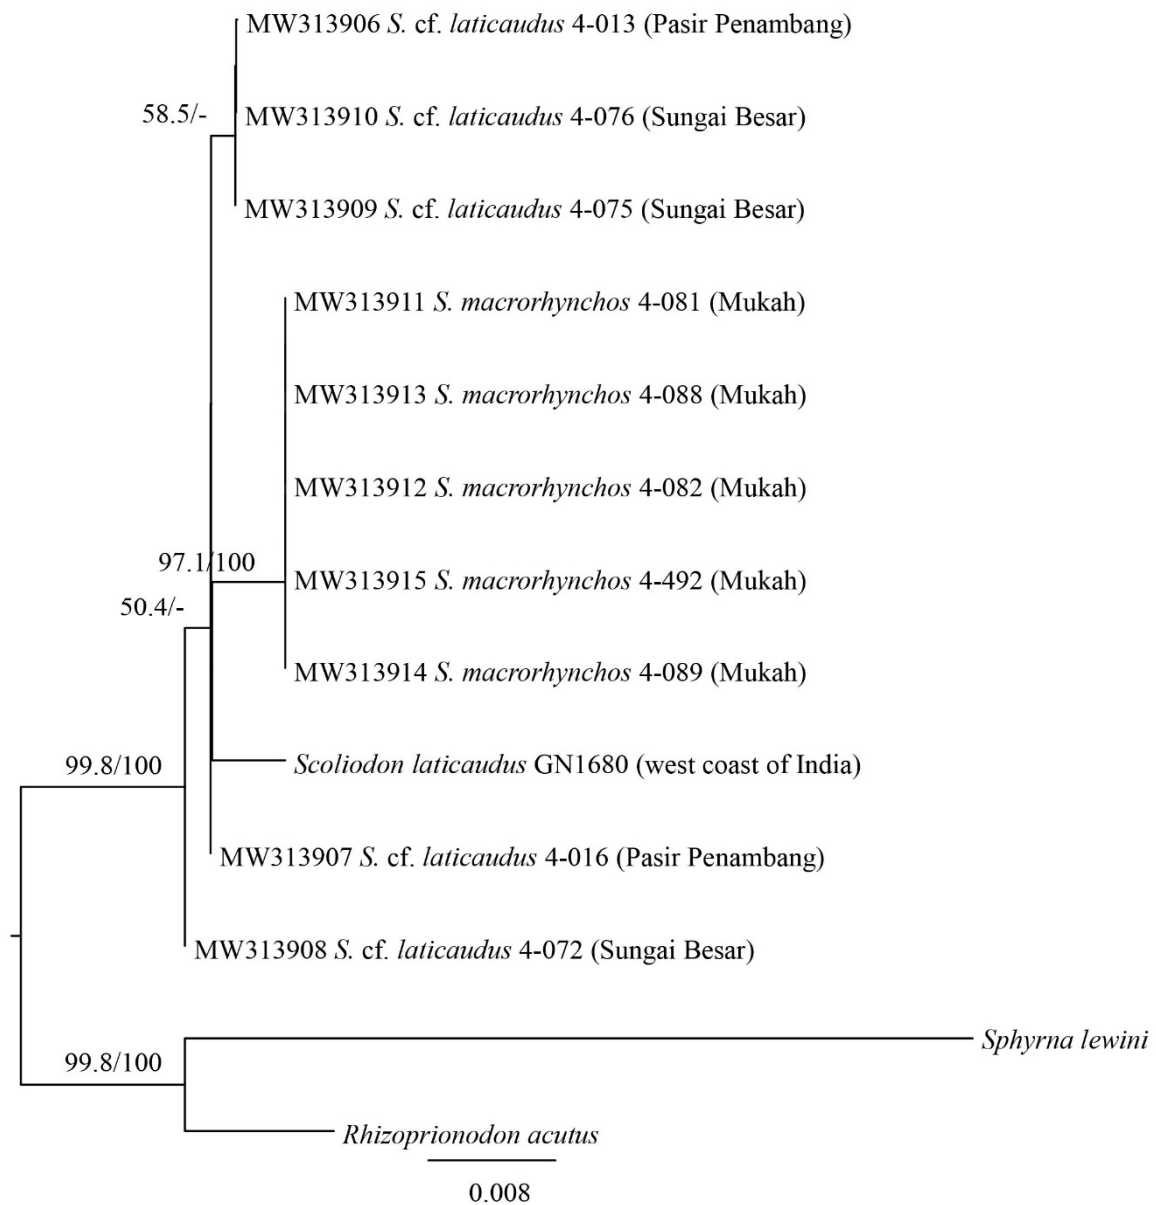

**Figure S1g.** RAG2 mid-point rooting phylogenetic relationships of *Scoliodon* species (phylogram). The bootstrap values (ML/Bi) are shown at branches.

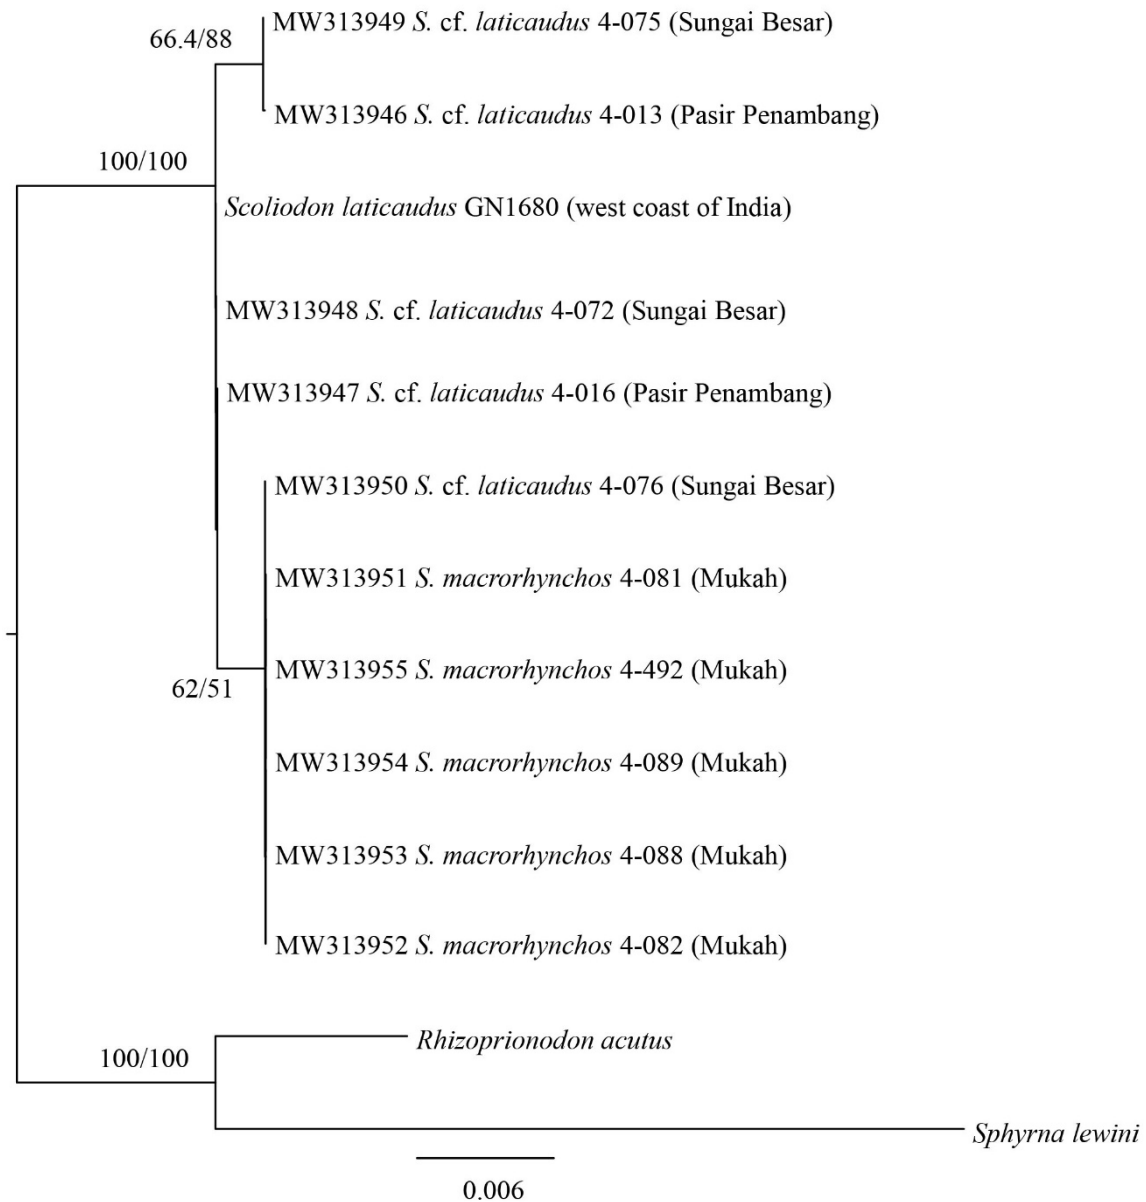

**Figure S1h.** SCFD2 mid-point rooting phylogenetic relationships of *Scoliodon* species (phylogram). The bootstrap values (ML/Bi) are shown at branches.

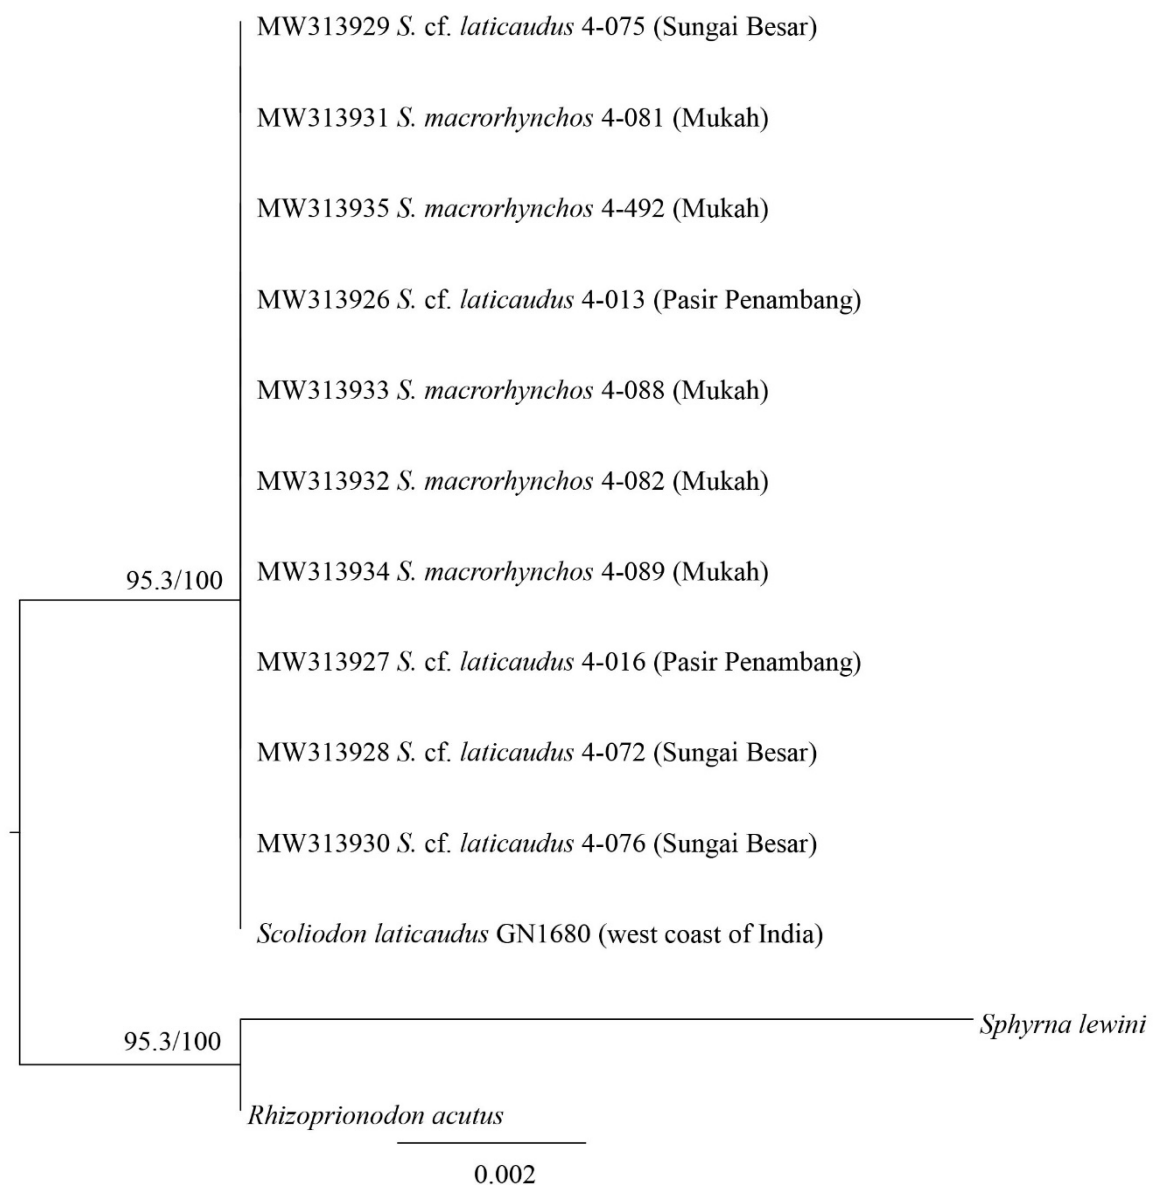

**Figure S1i.** TOBI mid-point rooting phylogenetic relationships of *Scoliodon* species (phylogram). The bootstrap values (ML/BI) are shown at branches.
